# Supplementary material for: Chinese herbal medicine for constipation: zheng-based associations among herbs, formulae, proprietary medicines, and herb–drug interactions
Source: Springer Nature journal article supplement (doi:10.1186/s13020-016-0099-4), 2016-06-23
Supplement: MOESM1 [file 10283964]

## RCT Jadad scores

Jadad developed a five-point questionnaire (Jadad Scores) to assess the methodological quality of clinical studies [10]. The Jadad Scale comprises of three points, **randomization**, **blinding**, and **withdrawals** and dropouts. If the method of randomization or blinding is appropriate, one point is given. If the method of randomization or blinding is inappropriate, one point is deducted.

### Jadad Scores (5-points)

1. *Was the study described as randomized?*
2. *Was the study described as double blind?*
3. *Was there a description of withdrawals and dropouts?*

One additional point is given for each question

1. *The method of randomization was described in the paper, and that method was appropriate.*
2. *The method of blinding was described, and it was appropriate.*

One additional point is deducted for each question

1. *The method of randomization was described, but was inappropriate.*
2. *The method of blinding was described, but was inappropriate.*

| Number | Author                  | Year | Jadad Scale |
|--------|-------------------------|------|-------------|
| 1      | Jiang M, Xiong N, et al | 2005 | 1           |
| 2      | Huo L, Zhang J, et al.  | 2006 | 1           |
| 3      | Jiang Y, Wang L.        | 2008 | 3           |
| 4      | Zhang L, Li N.          | 2006 | 1           |
| 5      | Kong L.                 | 2008 | 1           |
| 6      | Zhan C, Wang F.         | 2005 | 1           |
| 7      | Yan J, Liu Y.           | 2005 | 2           |
| 8      | Huang C.                | 2007 | 1           |
| 9      | Yu Y.                   | 2007 | 2           |
| 10     | Jin Z, Yang B, et al.   | 2008 | 2           |
| 11     | Sun G, Li J, et al.     | 2008 | 1           |
| 12     | Qiu B, Tang X, et al.   | 2008 | 2           |
| 13     | Song S.                 | 2010 | 2           |
| 14     | Zheng H.                | 2010 | 2           |
| 15     | Shi Z, Xu W, et al.     | 2009 | 2           |
| 16     | Lin Z, Li S.            | 2007 | 1           |
| 17     | Tang T, Qin J.          | 2009 | 2           |
| 18     | Li F, Chen Q.           | 2008 | 1           |
| 19     | Fan D.                  | 2007 | 2           |
| 20     | Wang H, Jin H.          | 2004 | 1           |
| 21     | Guan R, Zhao J.         | 2005 | 2           |
| 22     | Wu W.                   | 2005 | 2           |
| 23     | Sun Y, Cui Z.           | 2008 | 1           |
| 24     | Xie Y, Tang X, et al.   | 2007 | 1           |
| 25     | Liu Z.                  | 2007 | 2           |
| 26     | Qu Q.                   | 2013 | 3           |
| 27     | Liu X.                  | 2004 | 1           |
| 28     | Xie S, Feng J.          | 2014 | 3           |
| 29     | Zhan C, Chen J          | 2011 | 1           |
| 30     | Shi C, He Y, et al.     | 2009 | 2           |
| 31     | Gan A, Zhang F.         | 2008 | 1           |
| 32     | Yang T.                 | 2008 | 3           |
| 33     | Fan D, Qin X.           | 2009 | 2           |
| 34     | Li F, Shen J.           | 2004 | 1           |
| 35     | Wu RM.                  | 2009 | 2           |
| 36     | Cai HQ.                 | 2004 | 3           |
| 37     | Chen Z, Zeng E, et al.  | 2004 | 3           |
| 38     | Li S, Song C.           | 2005 | 2           |
| 39     | Yan L, Cao Y.           | 2007 | 1           |

|    |                          |      |   |
|----|--------------------------|------|---|
| 40 | Zhu Q.                   | 2008 | 2 |
| 41 | Sun H, Qiao Y, et al.    | 2008 | 1 |
| 42 | Xiong GH.                | 2012 | 3 |
| 43 | Yan X, Guo M.            | 2013 | 2 |
| 44 | Wang W.                  | 2006 | 1 |
| 45 | Liang C, Wu X.           | 2008 | 3 |
| 46 | Wang X, Zhu R.           | 2007 | 2 |
| 47 | Kang Y.                  | 2014 | 3 |
| 48 | Wang Q.                  | 2014 | 3 |
| 49 | Xin H, Zhang J.          | 2009 | 3 |
| 50 | Meng L.                  | 2009 | 2 |
| 51 | Guo S.                   | 2013 | 2 |
| 52 | Guo S, Xu J.             | 2009 | 2 |
| 53 | Jiang X, Zhang Q, et al. | 2011 | 2 |
| 54 | Li Y, Wang J.            | 2008 | 2 |
| 55 | Chen Y.                  | 2009 | 3 |
| 56 | Huang M.                 | 2013 | 2 |
| 57 | Zheng X, Xu Z.           | 2014 | 3 |
| 58 | Zhang H.                 | 2014 | 3 |
| 59 | Jian F, Li G.            | 2010 | 2 |
| 60 | Yin K.                   | 2013 | 3 |
| 61 | Shi C, Zhou J.           | 2008 | 3 |
| 62 | Zang X, Liu R.           | 2010 | 3 |
| 63 | Liu D.                   | 2011 | 2 |
| 64 | Guo M, Wang A.           | 2013 | 3 |
| 65 | Zhao Y.                  | 2013 | 3 |
| 66 | Dong H, Gao Y.           | 2009 | 3 |
| 67 | Ma X.                    | 2009 | 1 |
| 68 | Sun H.                   | 2011 | 3 |
| 69 | Sun J.                   | 2011 | 3 |
| 70 | Li J.                    | 2009 | 3 |
| 71 | Tan Y.                   | 2014 | 3 |

---
